# Supplementary material for: Cuproptosis-Related Signature Predicts the Prognosis, Tumor Microenvironment, and Drug Sensitivity of Hepatocellular Carcinoma
Source: Hindawi journal article supplement (doi:10.1155/2022/3393027), 2022-11-16

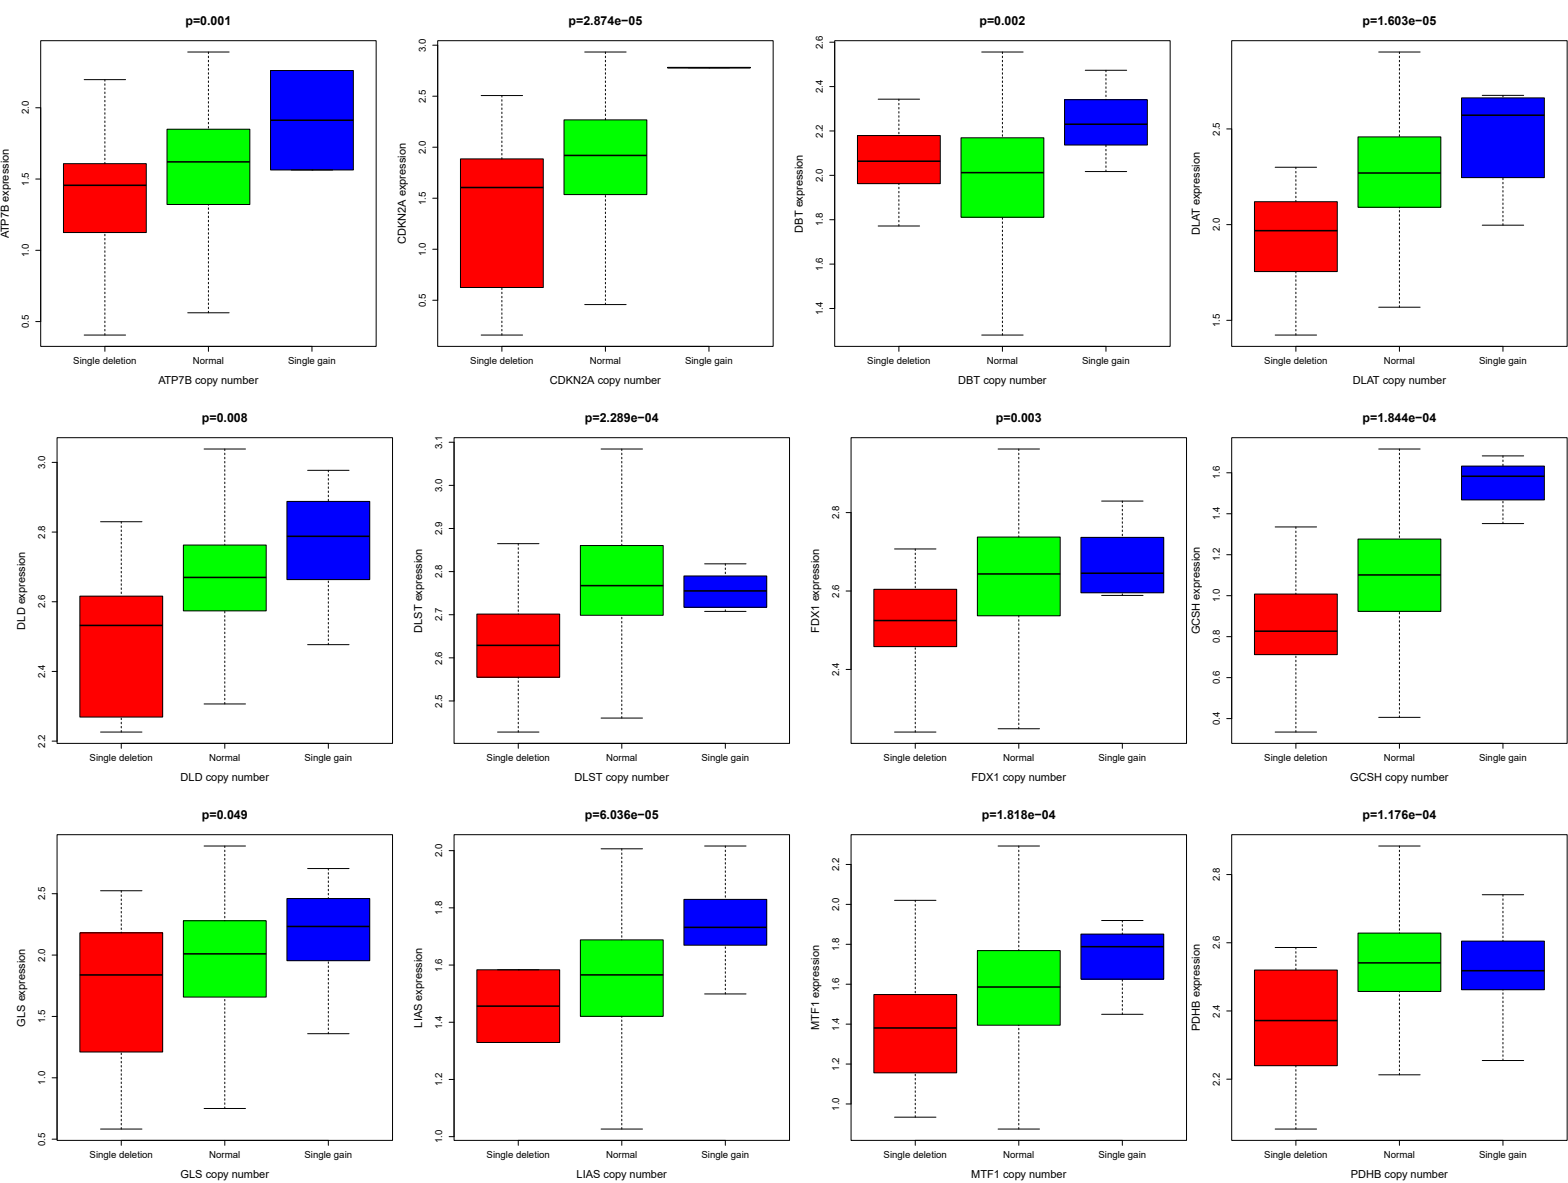

Supplement: f1 [file 3393027.f1.pdf]
