# Supplementary material for: Cuproptosis-Related Signature Predicts the Prognosis, Tumor Microenvironment, and Drug Sensitivity of Hepatocellular Carcinoma
Source: Hindawi journal article supplement (doi:10.1155/2022/3393027), 2022-11-16
Supplement: f2 [file 3393027.f2.pdf]

# NMF rank survey

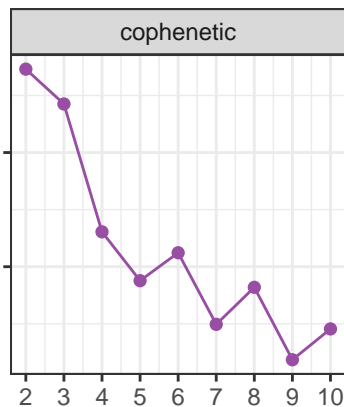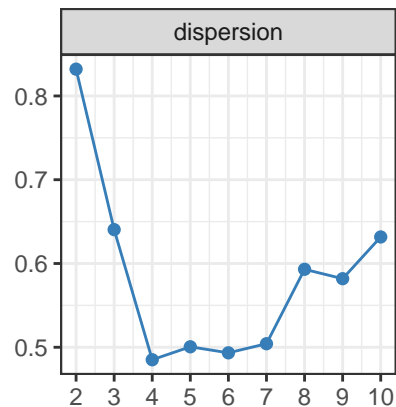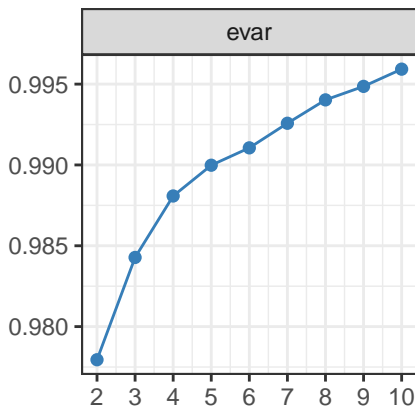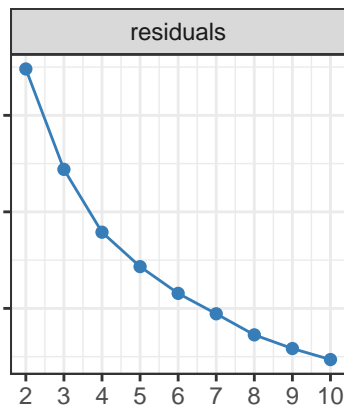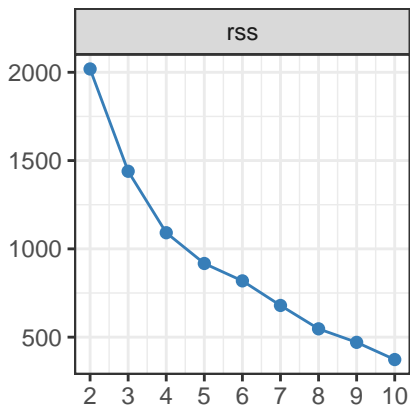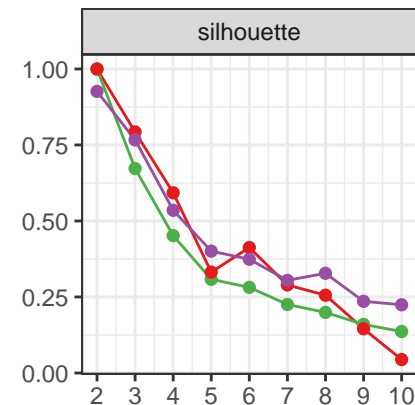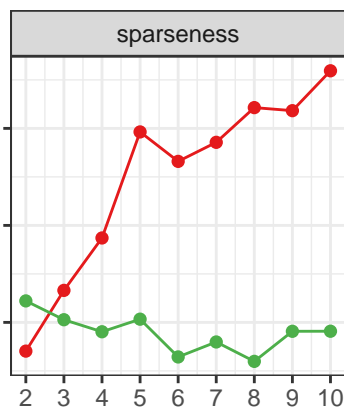

## Measure type

- Basis
- Best fit
- Coefficients
- Consensus
- NA

Factorization rank
